# Supplementary material for: Wound-Healing Potential of Rhoifolin-Rich Fraction Isolated from Sanguisorba officinalis Roots Supported by Enhancing Re-Epithelization, Angiogenesis, Anti-Inflammatory, and Antimicrobial Effects
Source: MDPI journal article supplement (doi:10.3390/ph15020178), 2022-01-31
Supplement: s1 [file s1]

# Wound Healing Potential of Rhoifolin Rich Fraction Isolated from *Sanguisorba officinalis* Roots Supported by Enhancing Re-Epithelization, Angiogenesis, Anti-Inflammatory, and Anti-microbial Effects

Walaa A. Negm <sup>1†</sup>, Aya H. El-Kadem <sup>2†</sup>, Engy Elekhawwy <sup>3</sup>, Nashwah G. M. Attallah <sup>4\*</sup>, Gadah Abdulaziz Al-Hamoud <sup>5</sup>, Thanaa A. El-Masry <sup>2</sup> and Ahmed Zayed <sup>1,6,\*</sup>

<sup>1</sup> Department of Pharmacognosy, Faculty of Pharmacy, Tanta University, Tanta 31527, Egypt; walaa.negm@pharm.tanta.edu.eg (W.A.N.), ahmed.zayed1@pharm.tanta.edu.eg (A.Z)

<sup>2</sup> Department of Pharmacology and Toxicology, Faculty of Pharmacy, Tanta University, Tanta 31527, Egypt; aya.elkadeem@pharm.tanta.edu.eg (A.H.E.-K.); thanaa.elmasri@pharm.tanta.edu.eg (T.A.E.)

<sup>3</sup> Pharmaceutical Microbiology Department, Faculty of Pharmacy, Tanta University, Tanta 31527, Egypt; engy.ali@pharm.tanta.edu.eg (E.E.)

<sup>4</sup> Department of Pharmaceutical Sciences, College of Pharmacy, Princess Nourah bint Abdulrahman University, Riyadh 84428, Saudi Arabia; ngmohamed@pnu.edu.sa (N.G.M.A.)

<sup>5</sup> Department of Pharmacognosy, College of Pharmacy, King Saud University, Riyadh 11495, Saudi Arabia; galhamoud@ksu.edu.sa (G.A.A.H.)

<sup>6</sup> Institute of Bioprocess Engineering, Technical University of Kaiserslautern, Gottlieb-Daimler-Straße 49, 67663 Kaiserslautern, Germany

\* Correspondence: ngmohamed@pnu.edu.sa (N.G.M.A.), ahmed.zayed1@pharm.tanta.edu.eg (A.Z)

†These authors contributed equally to this work.

## List of Supplementary Figures

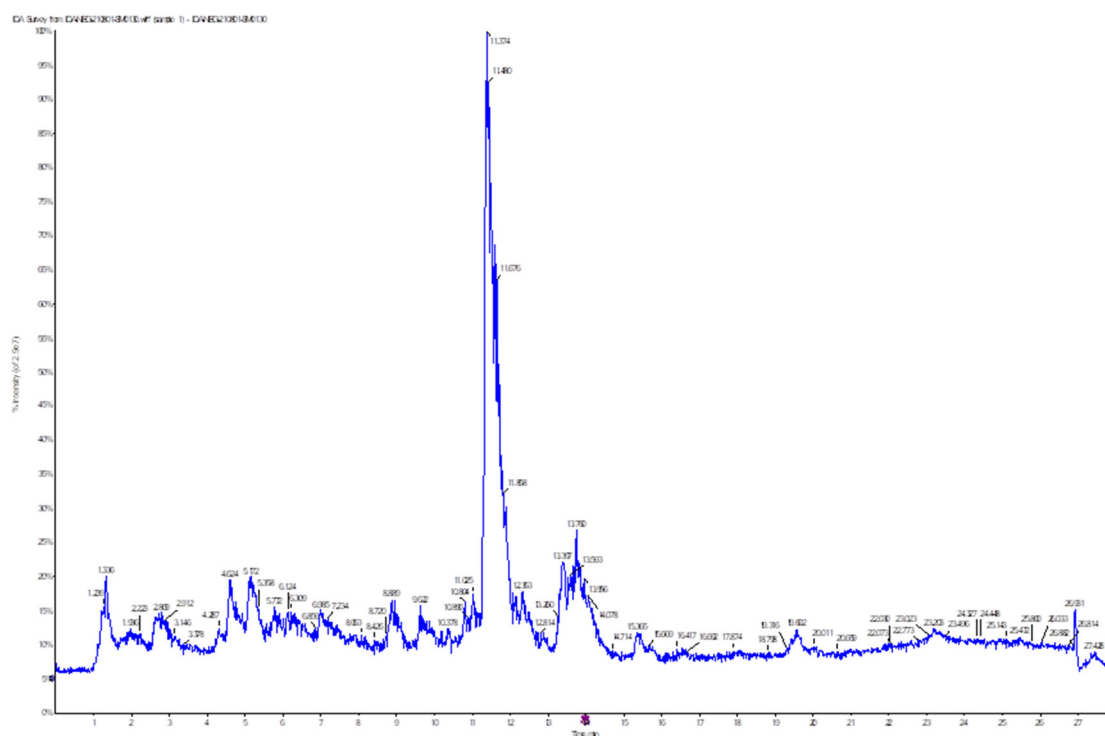

**Figure S1:** TIC of LC-ESI-MS/MS analysis of *S. officinalis* roots ethanol extract in negative ionization mode

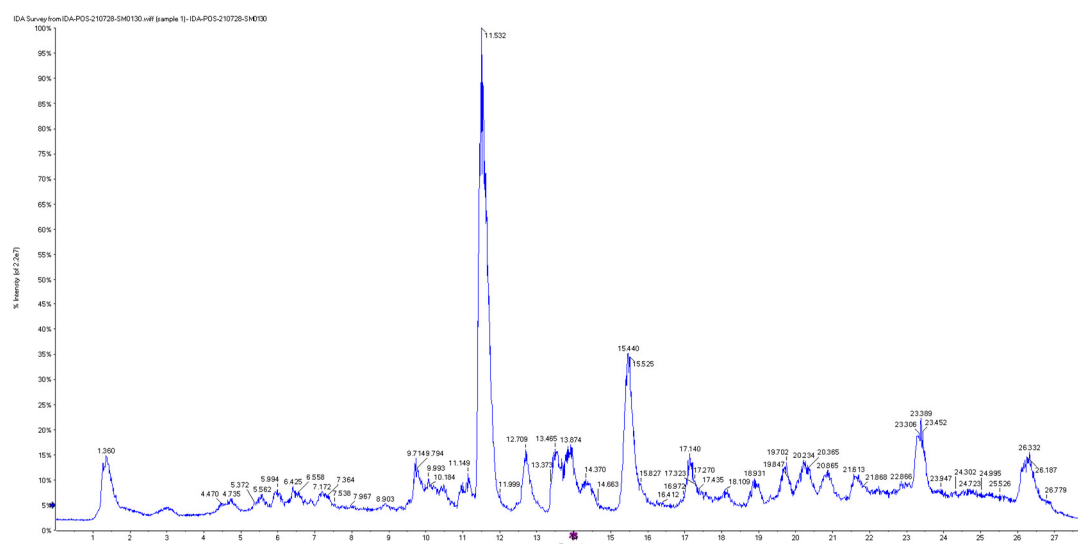

**Figure S2:** TIC of LC-ESI-MS/MS analysis of *S. officinalis* roots ethanol extract in positive ionization mode

## XIC of 343.046 mass

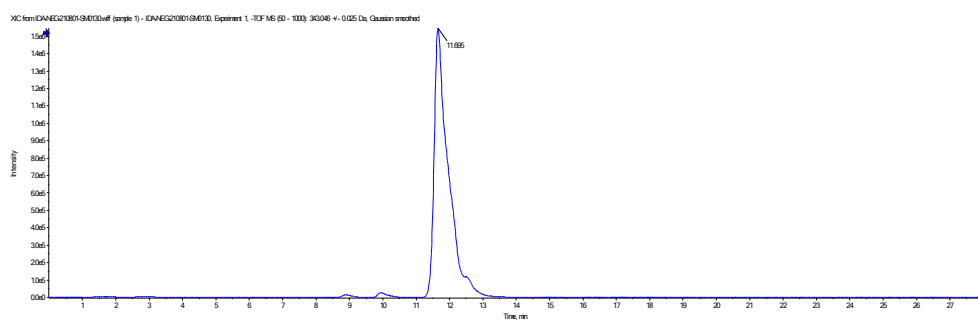

## XIC of 423.003 mass

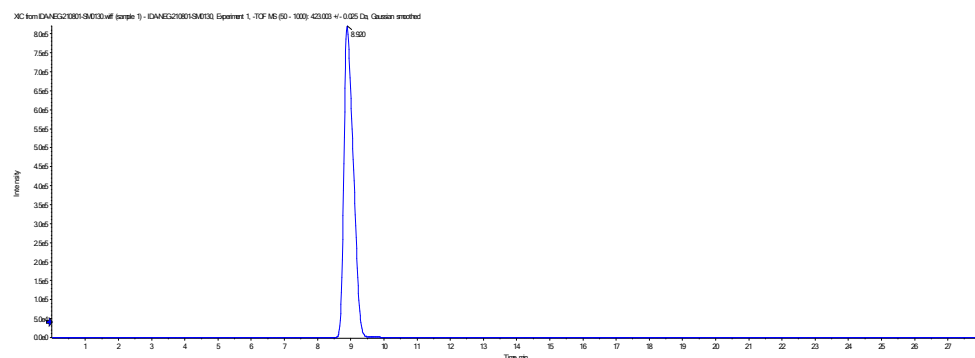

And the following example represents an **overlayed Extracted Ion Chromatograms** for five different masses at different retention times from which we can have an overview of chromatographic separation

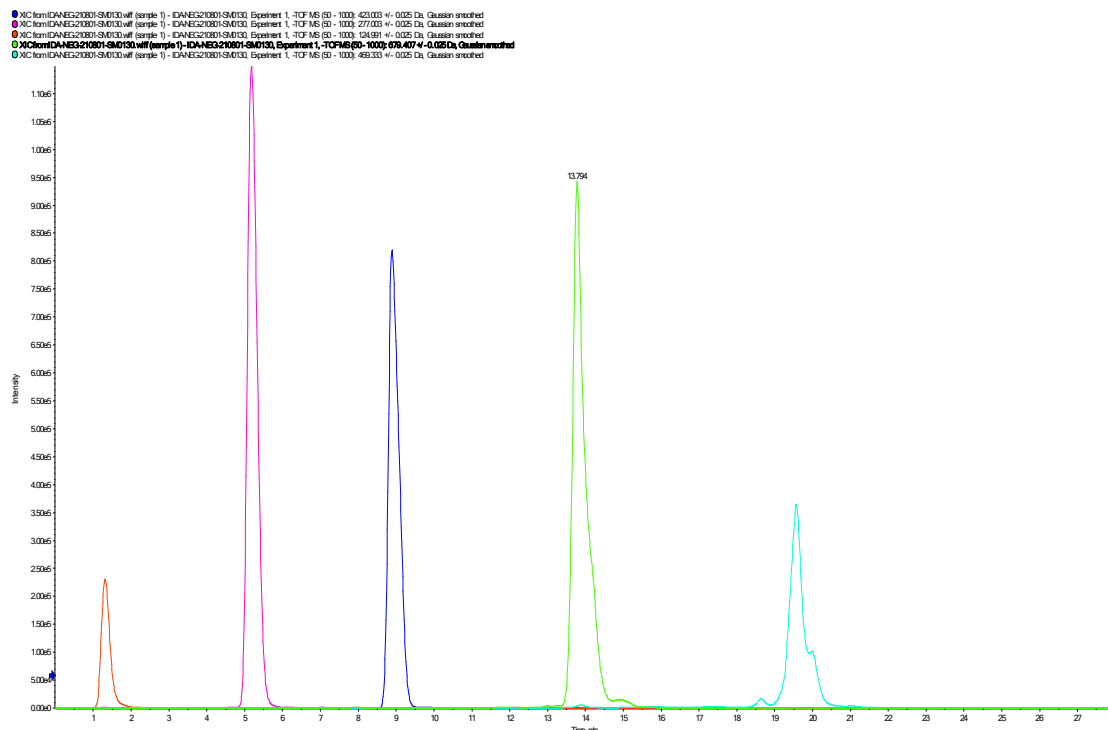

The above conditions are also valid for the other TIC found in **Figure S2**: TIC of LC-ESI-MS/MS analysis of *S. officinalis* roots ethanol extract in positive ionization mode, upon single mass extraction

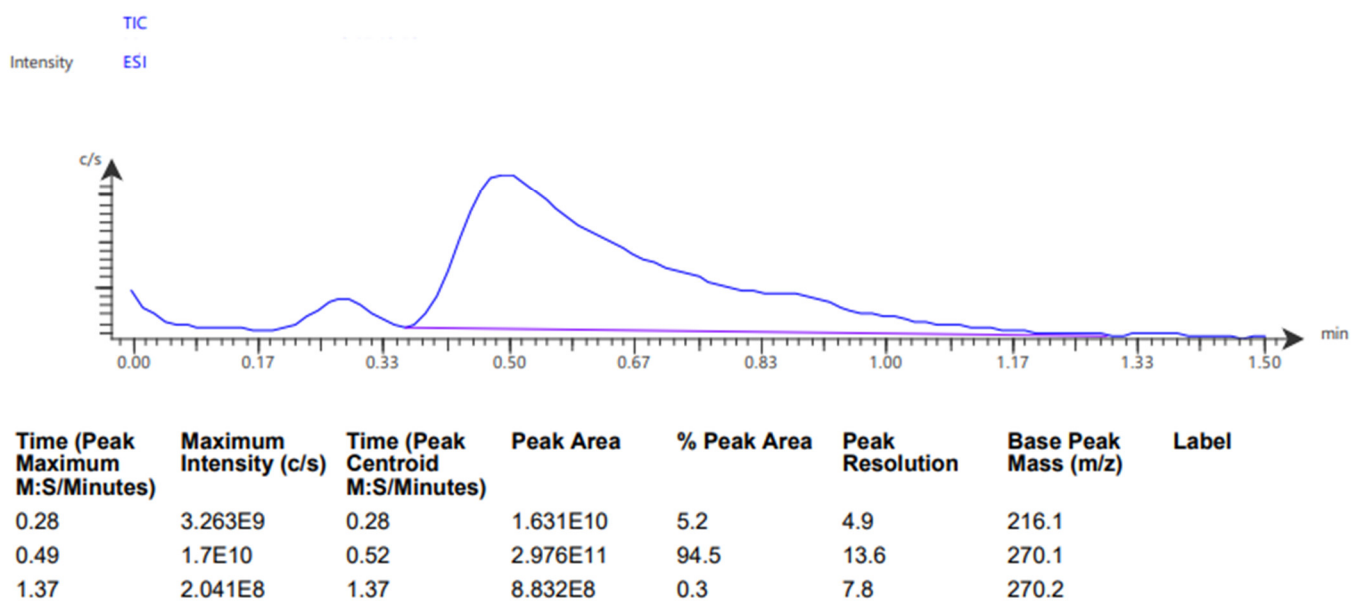

**Figure S3:** Total ion chromatogram (TIC) of rhoifolin rich fraction (RRF) isolated from *S. officinalis* roots ethanol extract

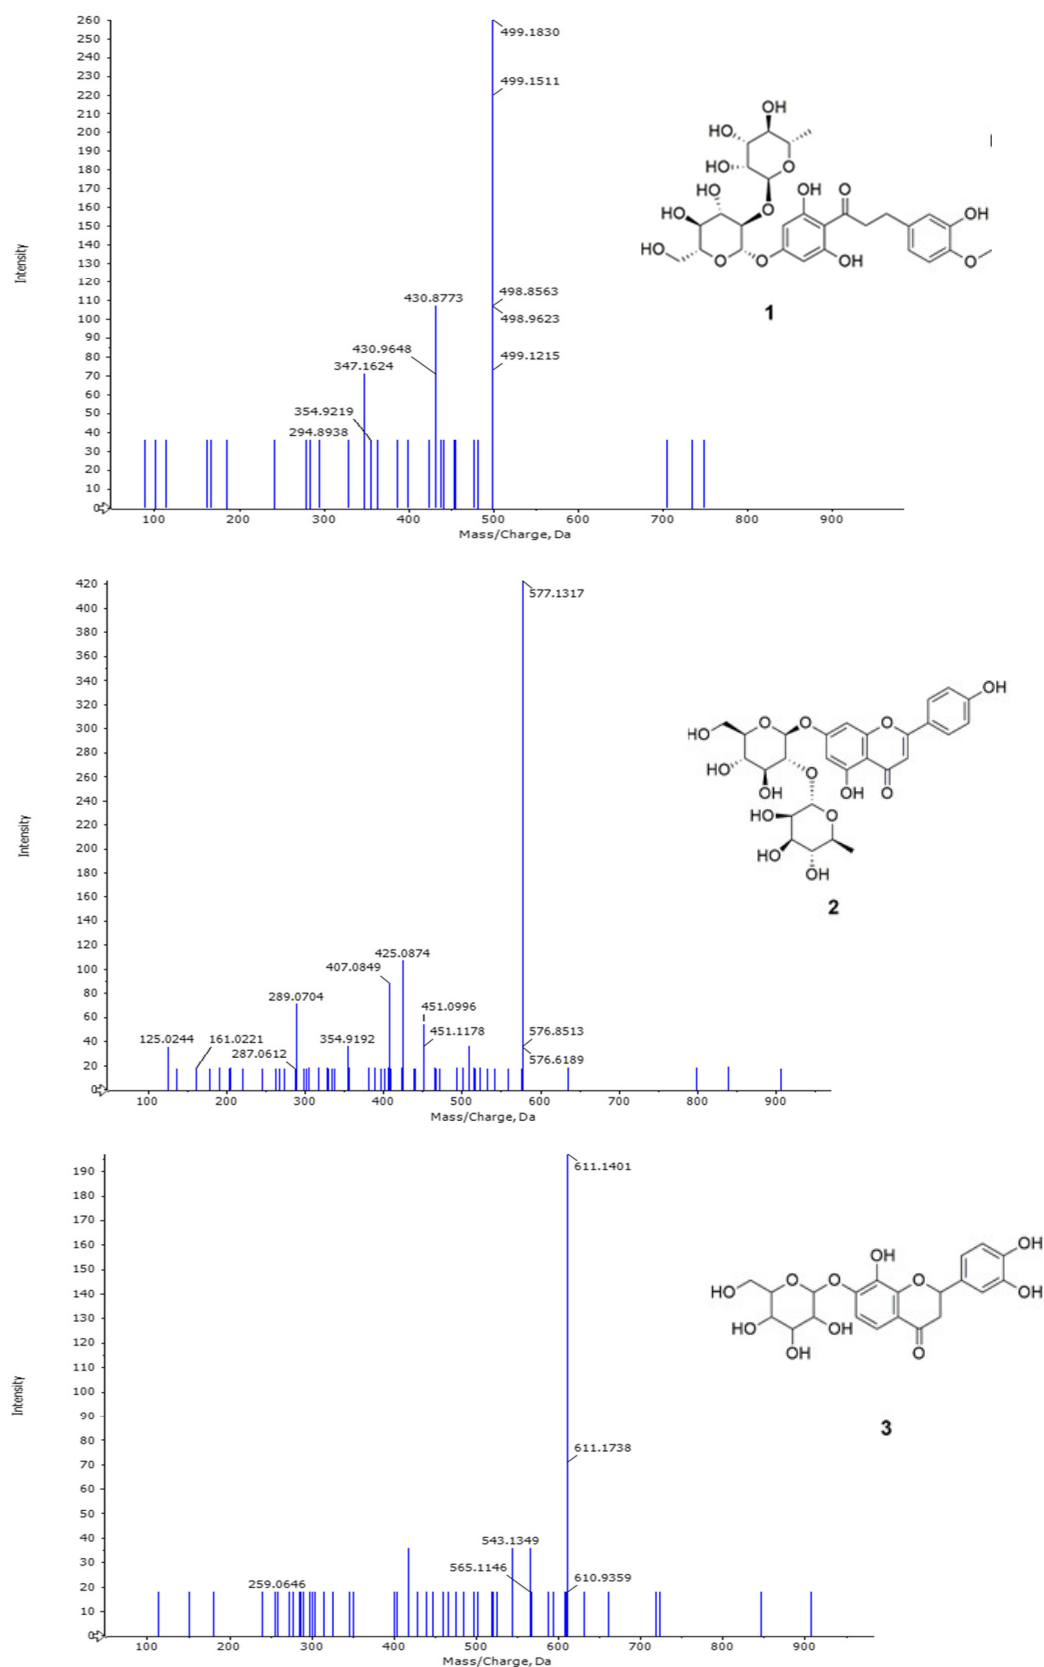

**Figure S4:** ESI/MS of identified compounds in rhoifolin rich fraction (RRF). The compounds were tentatively identified as neohesperidin dihydrochalcone (**1**), apigenin 7-*O*-neohesperidoside (Rhoifolin) (**2**), and isookanin-7-glucoside (flavanomarein) (**3**).

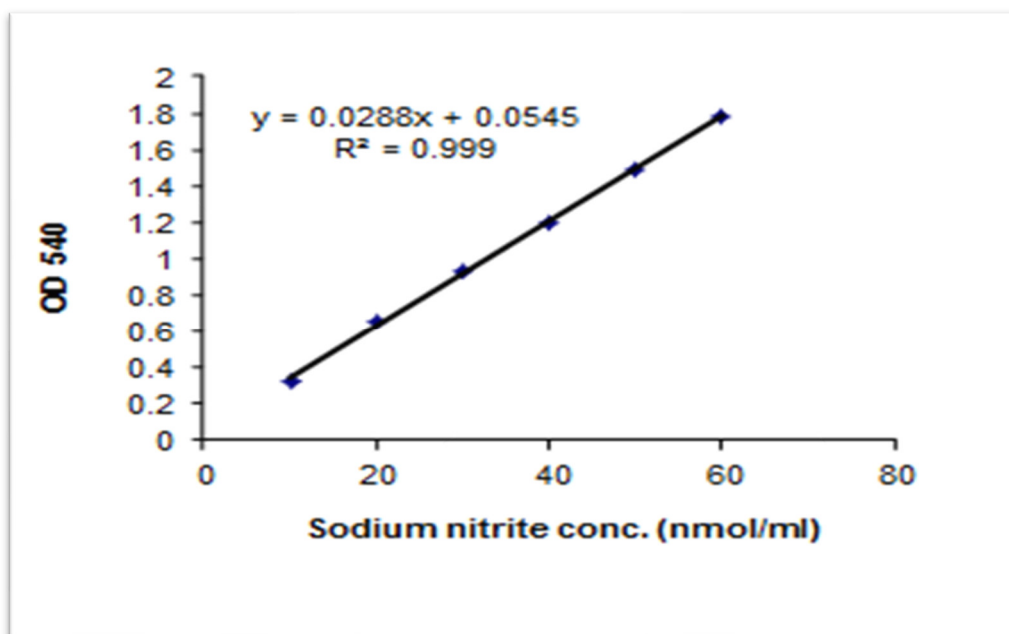

Figure S5: NO standard curve

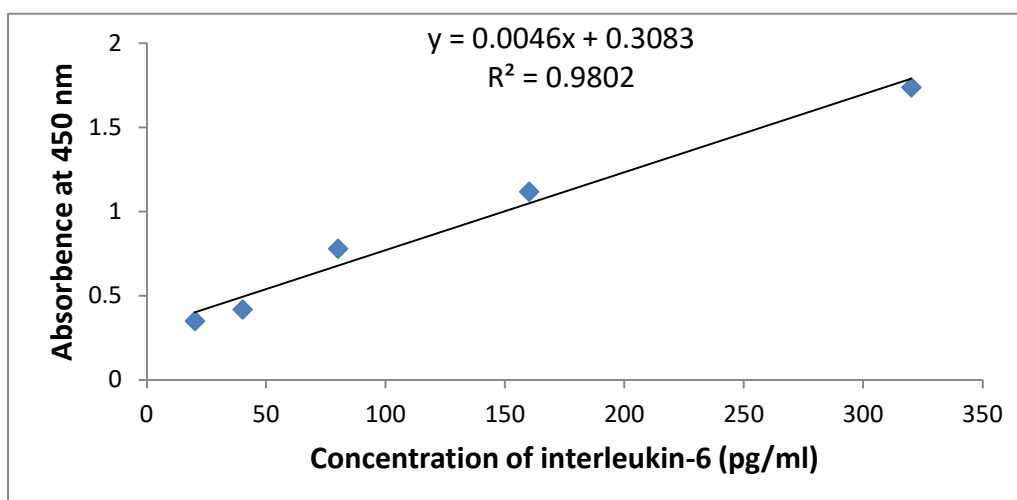

Figure S6: IL-6 standard curve

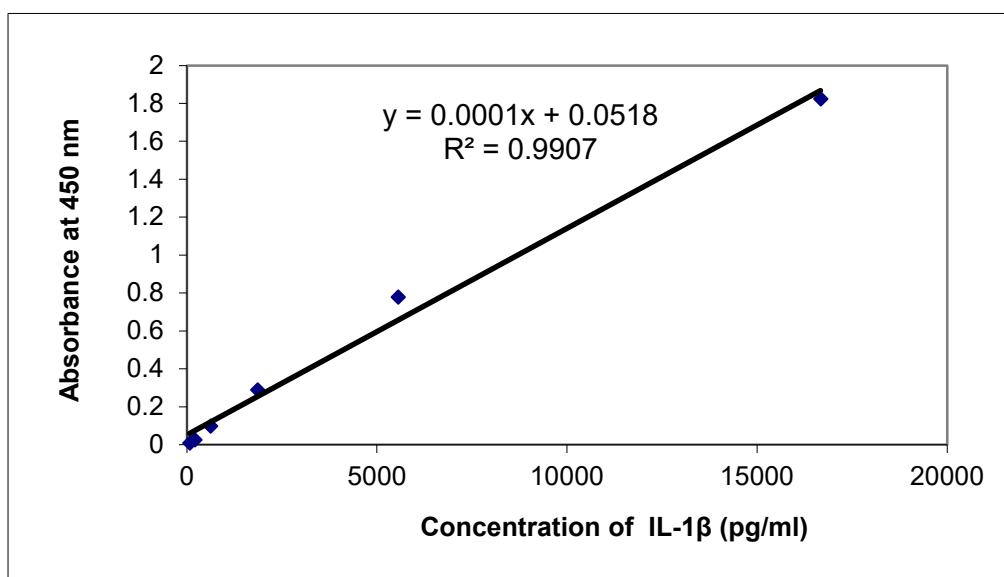

**Figure S7:** IL-1 $\beta$  standard curve

## List of Supplementary Tables

**Table S1.** MIC values of RRF against the tested *P. aeruginosa* isolates and the level of their biofilm forming ability.

| Isolate code | RRF MIC value (µg/mL) | Level of biofilm forming ability* | Isolate code | RRF MIC value (µg/mL) | Level of biofilm forming ability* |
|--------------|-----------------------|-----------------------------------|--------------|-----------------------|-----------------------------------|
| P1           | 128                   | Strong                            | P9           | 128                   | Weak                              |
| P2           | 64                    | Strong                            | P10          | 256                   | Weak                              |
| P3           | 256                   | Strong                            | P11          | 128                   | Moderate                          |
| P4           | 256                   | Strong                            | P12          | 64                    | Not forming                       |
| P5           | 512                   | Not forming                       | P13          | 128                   | Weak                              |
| P6           | 64                    | Weak                              | P14          | 256                   | Weak                              |
| P7           | 64                    | Moderate                          | P15          | 64                    | Not forming                       |
| P8           | 512                   | Moderate                          |              |                       |                                   |

\*Based on the results of crystal violet assay

**Table S2.** MIC values of RRF against the tested *S. aureus* isolates and the level of their biofilm forming ability.

| Isolate code | RRF MIC value (µg/mL) | Level of biofilm forming ability* | Isolate code | RRF MIC value (µg/mL) | Level of biofilm forming ability* |
|--------------|-----------------------|-----------------------------------|--------------|-----------------------|-----------------------------------|
| S1           | 128                   | Strong                            | S14          | 128                   | Not forming                       |
| S2           | 64                    | Strong                            | S15          | 256                   | Not forming                       |
| S3           | 256                   | Strong                            | S16          | 512                   | Moderate                          |
| S4           | 256                   | Strong                            | S17          | 64                    | Moderate                          |
| S5           | 512                   | Weak                              | S18          | 64                    | Weak                              |

|     |     |             |     |     |             |
|-----|-----|-------------|-----|-----|-------------|
| S6  | 512 | Not forming | S19 | 64  | Not forming |
| S7  | 64  | Moderate    | S20 | 256 | Weak        |
| S8  | 128 | Weak        | S21 | 512 | Not forming |
| S9  | 128 | Moderate    | S22 | 256 | Moderate    |
| S10 | 64  | Weak        | S23 | 64  | Moderate    |
| S11 | 512 | Weak        | S24 | 128 | Weak        |
| S12 | 256 | Moderate    | S25 | 256 | Moderate    |
| S13 | 128 | Not forming | S26 | 128 | Moderate    |

\*Based on the results of crystal violet assay

**Table S3.** Sequences of the utilized primers (*in vitro* study)

| Gene           | Primer sequence*                                                             |
|----------------|------------------------------------------------------------------------------|
| COX-2          | F 5'-TTCAAATGAGATTGTGGGAAAATTGCT-3'<br>R 5'-AGATCATCTCTGCCTGAGTATCTT-3'      |
| iNOS           | F 5'-TCTTGGTCAAAGCTGTGCTC-3'<br>R 5'-CATTGCCAAACGTACTGGTC-3'                 |
| IL-6           | F 5'-AAAGAGGCACTGGCAGAAAA-3'<br>R 5'-AGCTCTGGCTTGTTCCCTCAC-3'                |
| TNF- $\alpha$  | F 5'-ATGAGCACTGAAAGCATGATC-3'<br>R 5'-TCACAGGGCAATGATCCCAAAGTAGACCTGCCC-3'   |
| NF- $\kappa$ B | F 5'-GCGGGAGAGGGGATTCCCTGCGGCCCG-3'<br>R 5'-CGGGGCCGCGAGGGAATCCCCTCTCCCGC-3' |
| GAPDH          | F 5'-ACCACAGTCCATGCCATCAC-3'<br>R 5'-TCCACCACCCTGTTGCTGTA-3'                 |

\* F stands for forward and R stands for reverse.

**Table S4.** Forward and reverse primer sequences used in quantitative RT-PCR (*in vivo* study)

| Target gene                | Probe                          |
|----------------------------|--------------------------------|
| VEGF                       | F 5'-AGGCTGCACCCACGACAGAA-3'   |
|                            | R 5'-CTTTGGTCTGCATTACATC-3'    |
| PDGF-B                     | F 5'-TGCCAGAGCCTGCTCTTAAC-3'   |
|                            | R 5'-GATGCCACGGAGATAAGCGA-3'   |
| Keratinocyte growth factor | F 5'-TCTGTCGAACACAGTGGTACCT-3' |
|                            | R 5'-GTGTGTCCATTTAGCTGATGCAT   |
| Fibronectin                | F 5'-GAGCTATCCATTTACCTTCAGA    |
|                            | R 5'-TTGTTCGTAGACACTGGAGAC     |
| MMP-1                      | F 5'-TGGGATTTCCAAAAGAGGTG      |
|                            | R 5'-ACGTGGTTCCCTGAGAAGA       |
| GAPDH                      | F 5'-CAGCAATGCATCCTGCAC-3'     |
|                            | R 5'-GAGTTGCTGTTGAAGTCACAGG-3' |
